# Supplementary material for: A Hybrid Visualizing Approach Based on Adaptive Neuro-fuzzy Inference System, Decision Tree, and K-means for Intrusion Detection
Source: Research Square preprint supplement (doi:10.21203/rs.3.rs-1770107/v1), 2022-07-01
Supplement: Supplementary file 1 [file 26720c62d09629b3a4db0daf.docx]

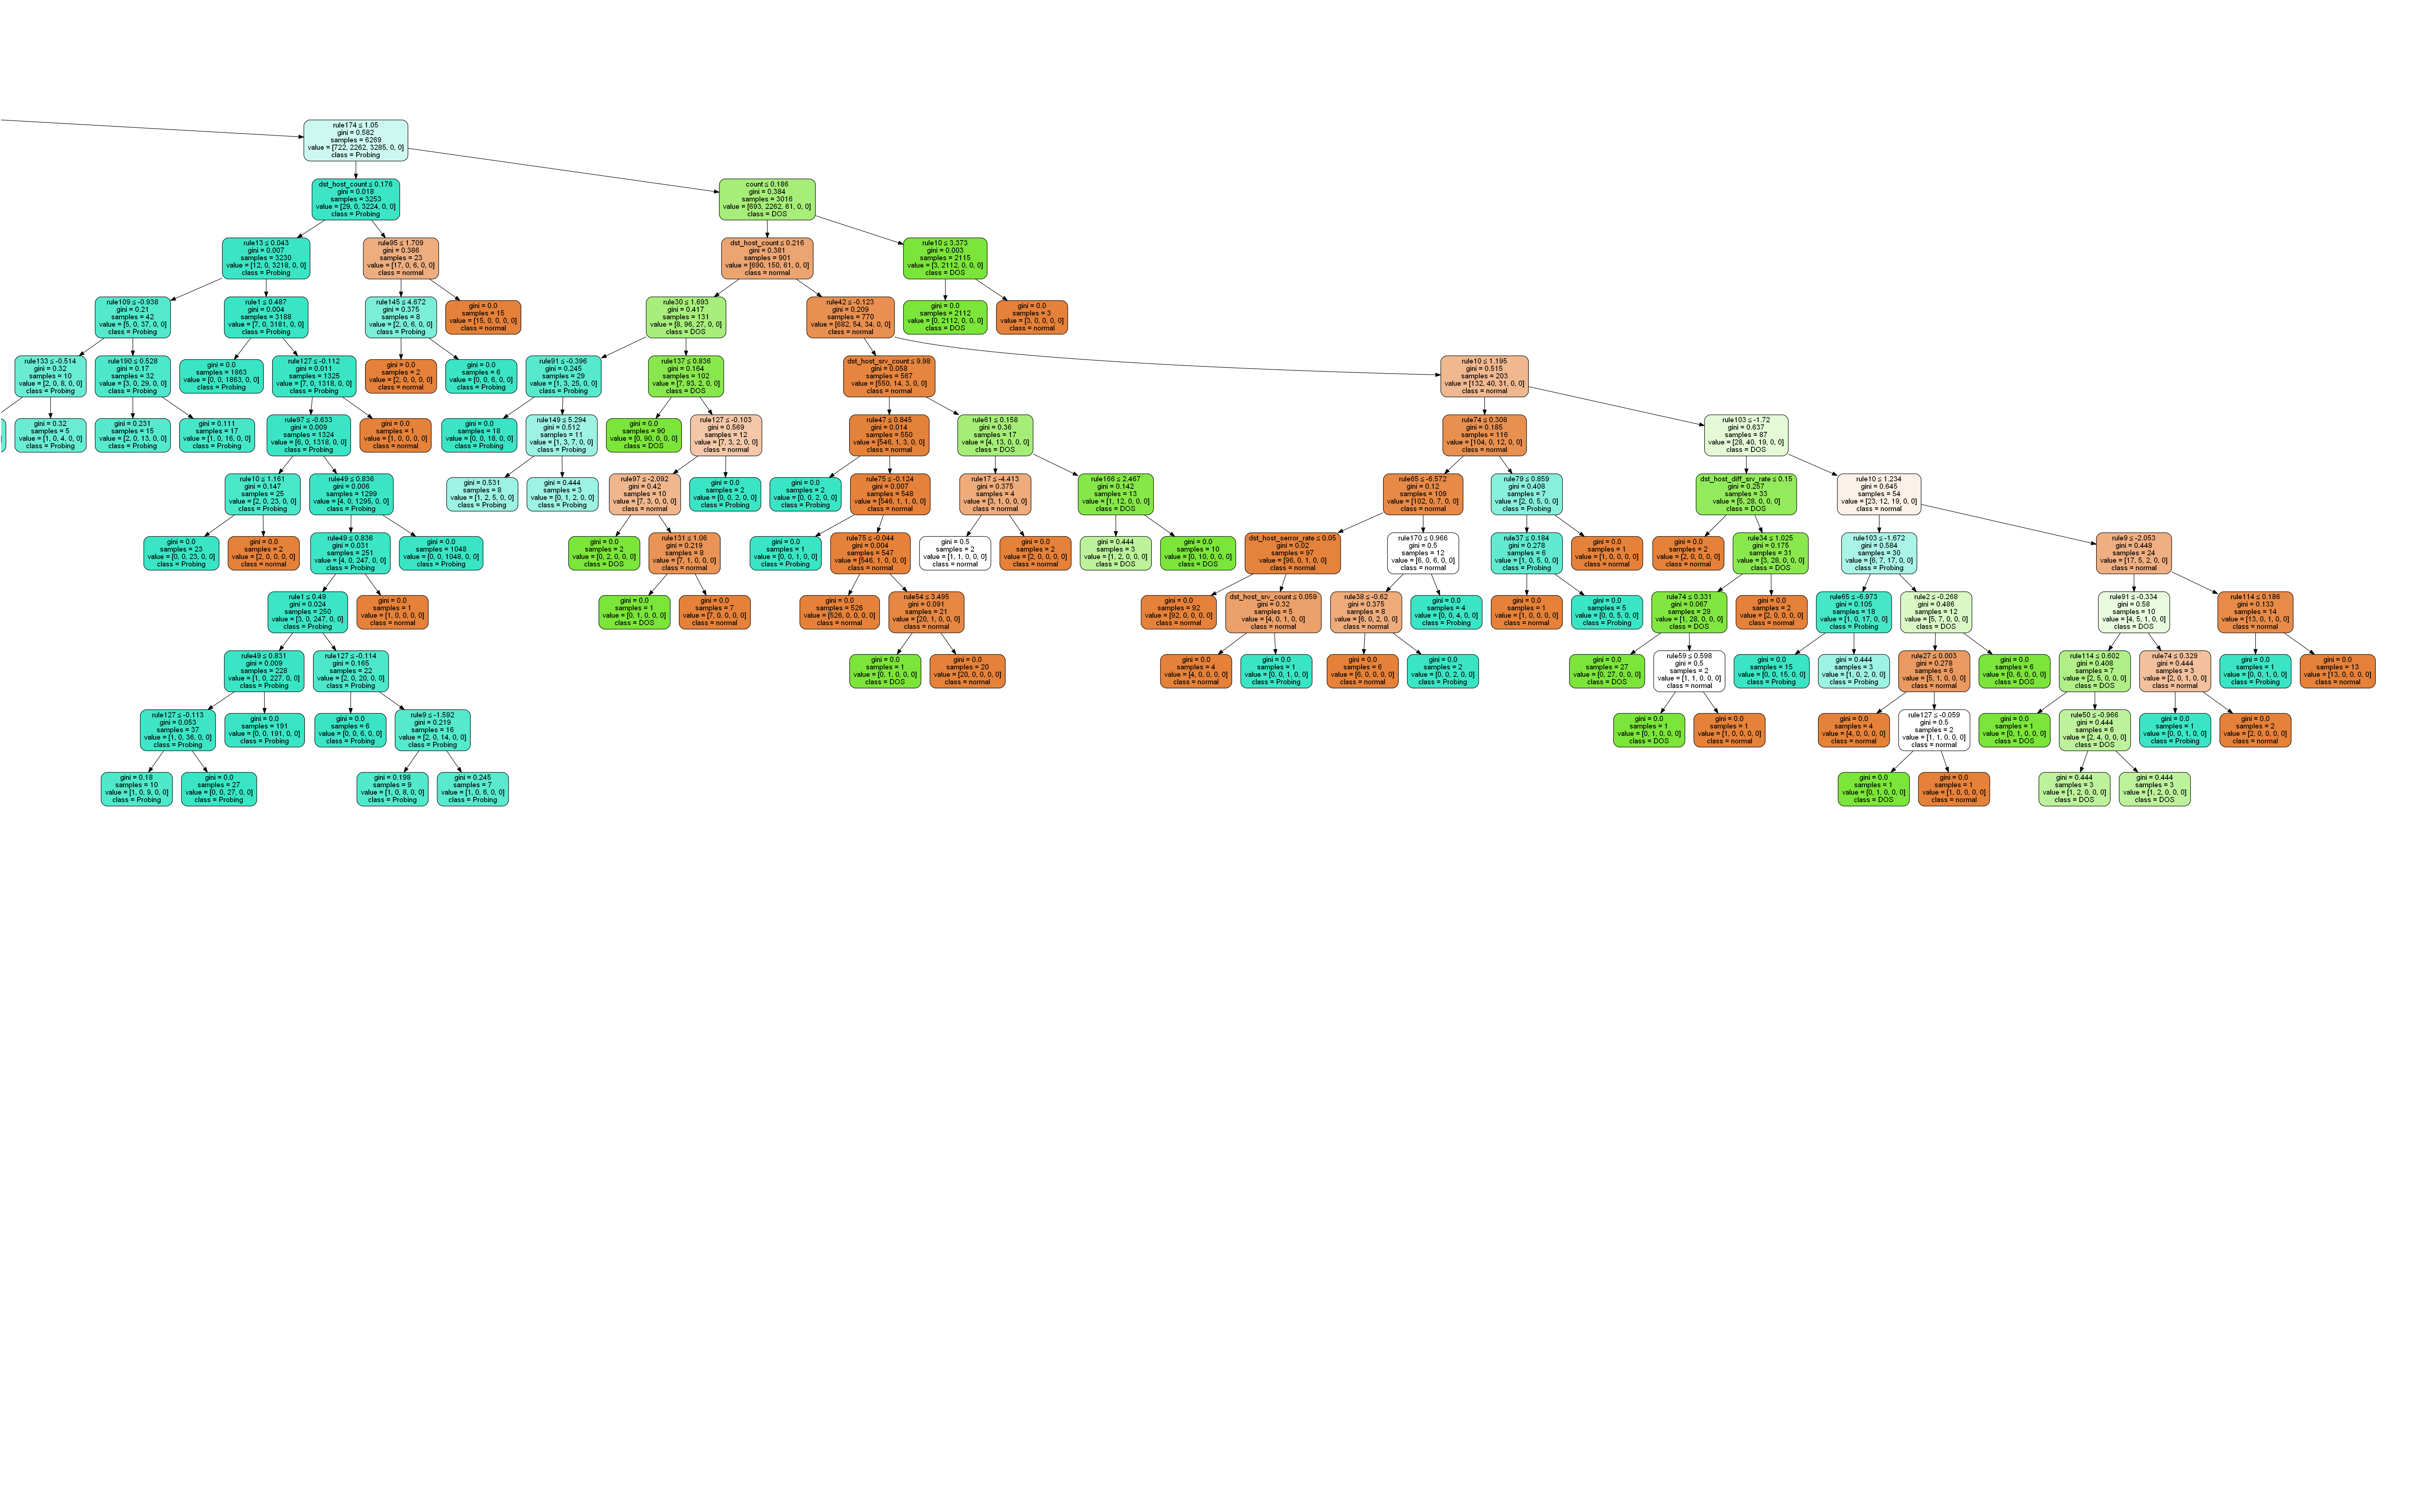
Appendix D

**Appendix D. (a) ANFIS-enhanced CART tree. The rules are fuzzy rules by ANFIS.**

**
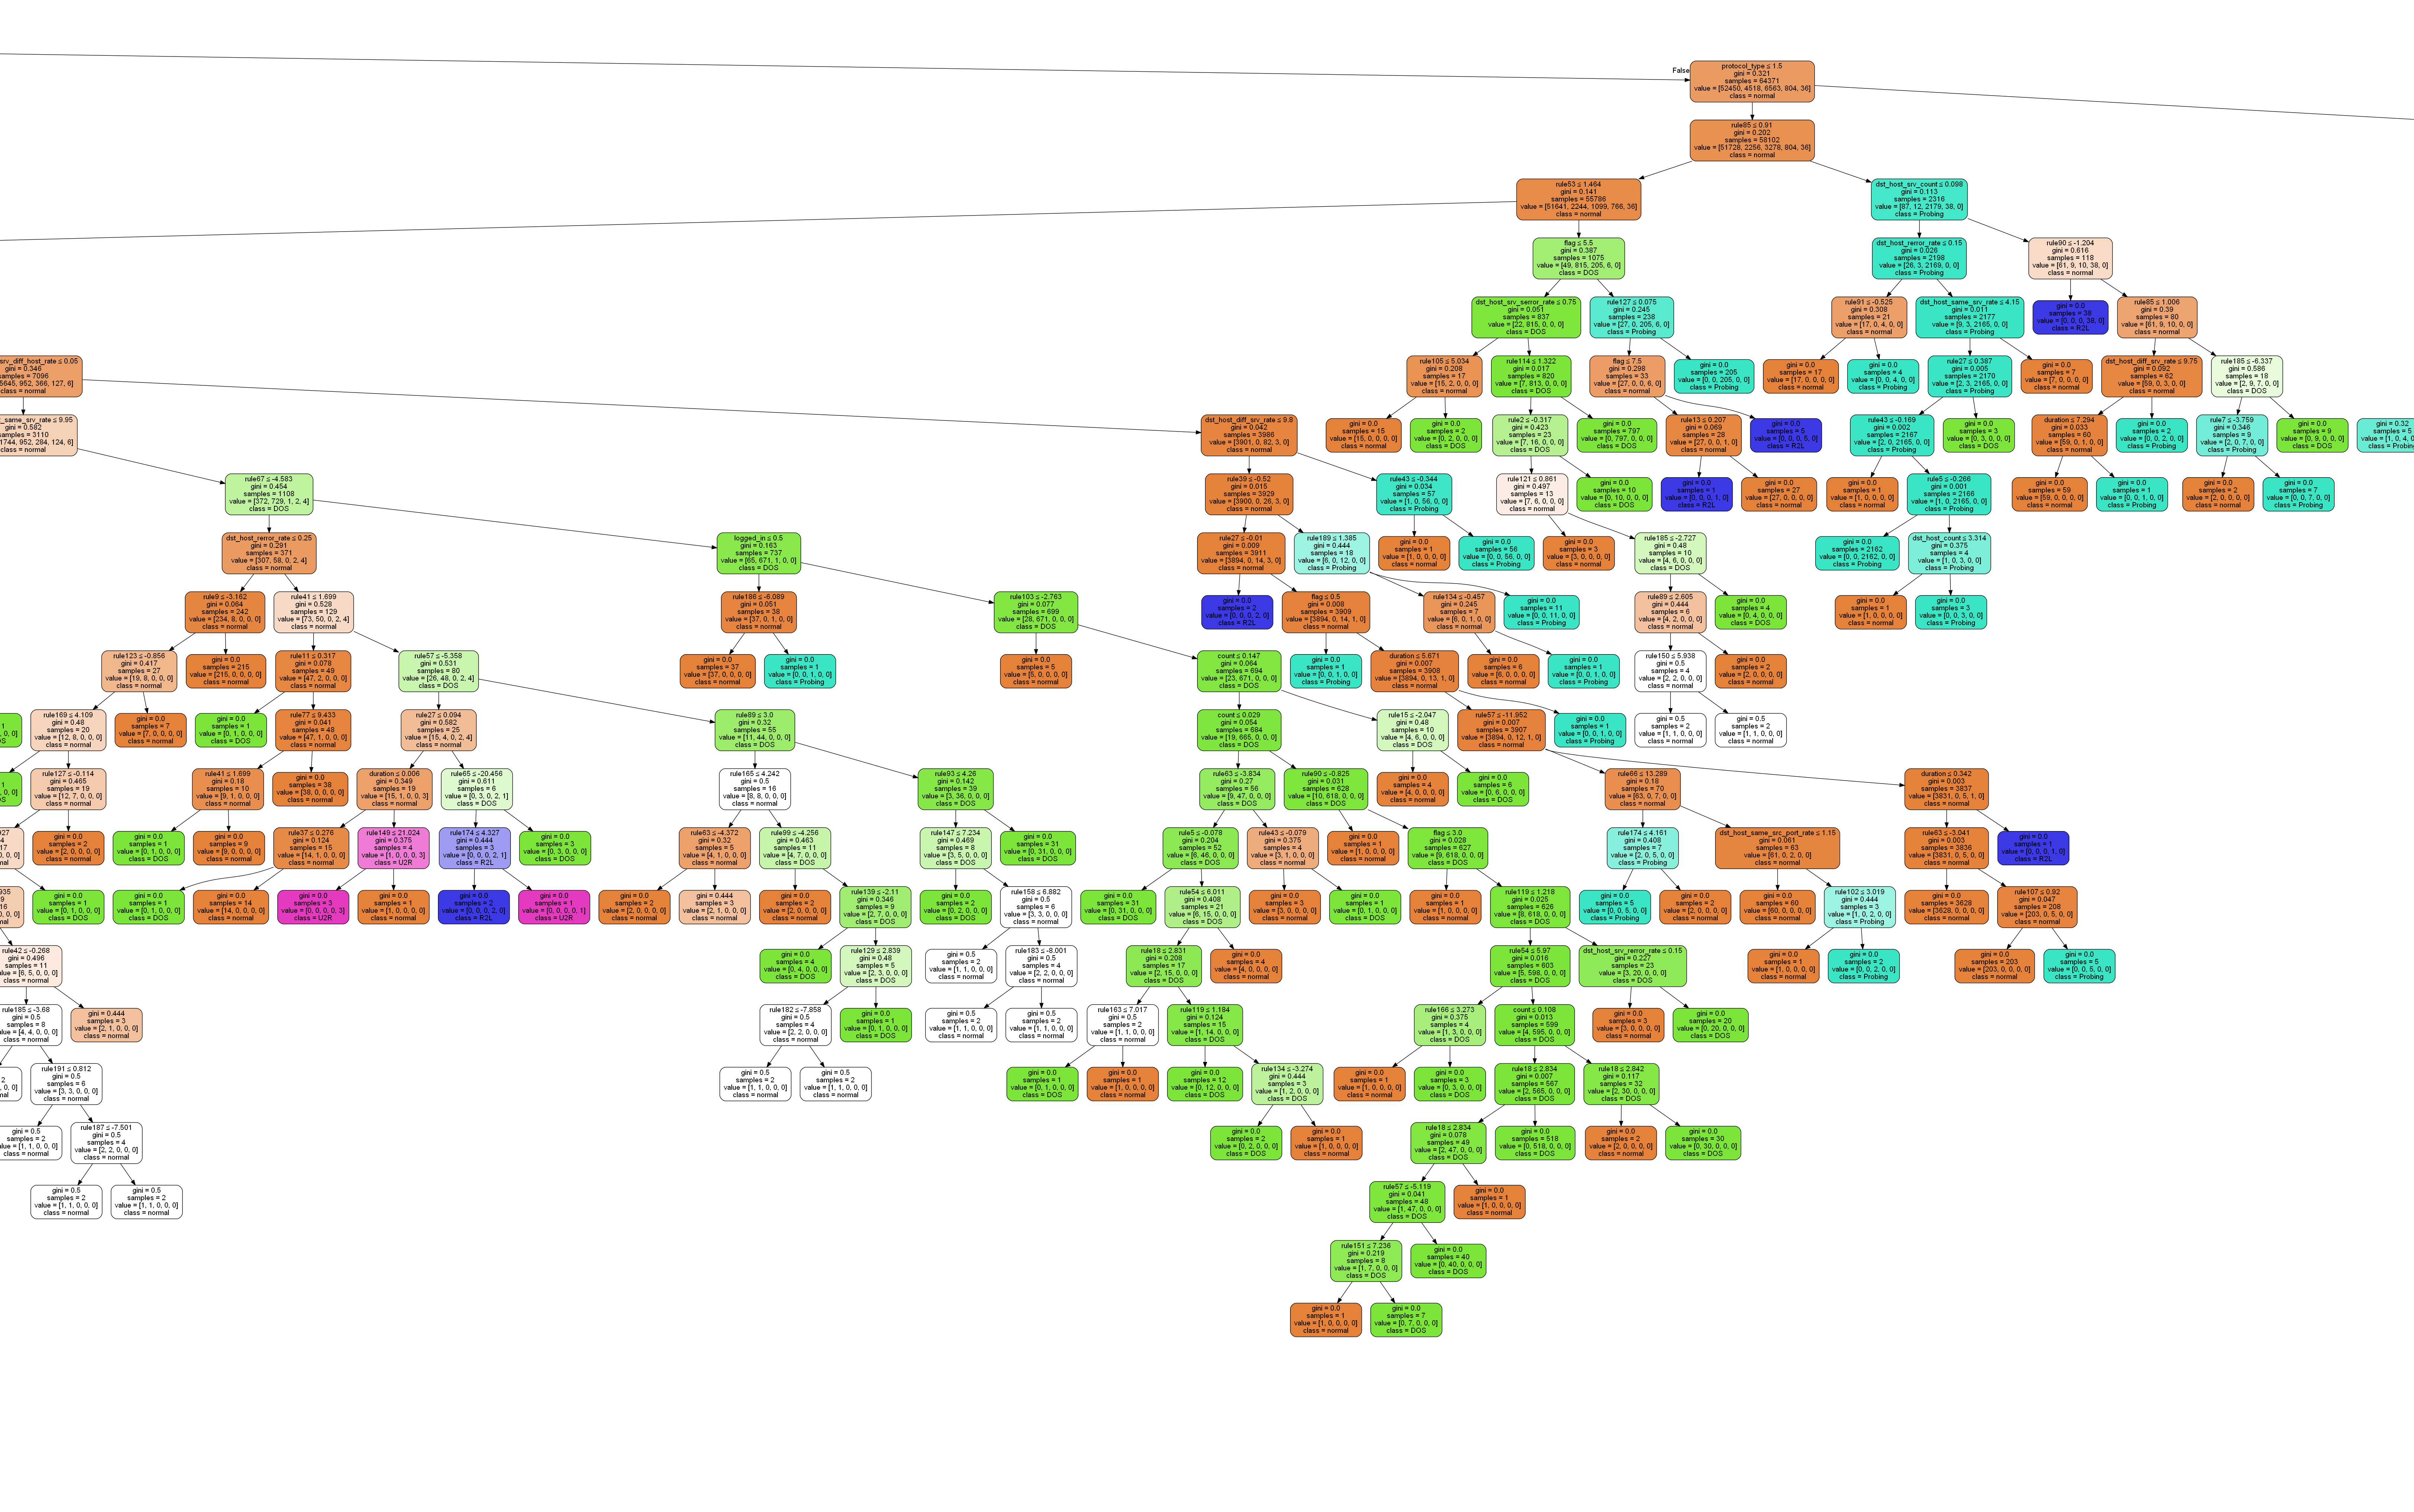
**

**Appendix D. (b) ANFIS-enhanced CART tree. The rules are fuzzy rules by ANFIS.**

**
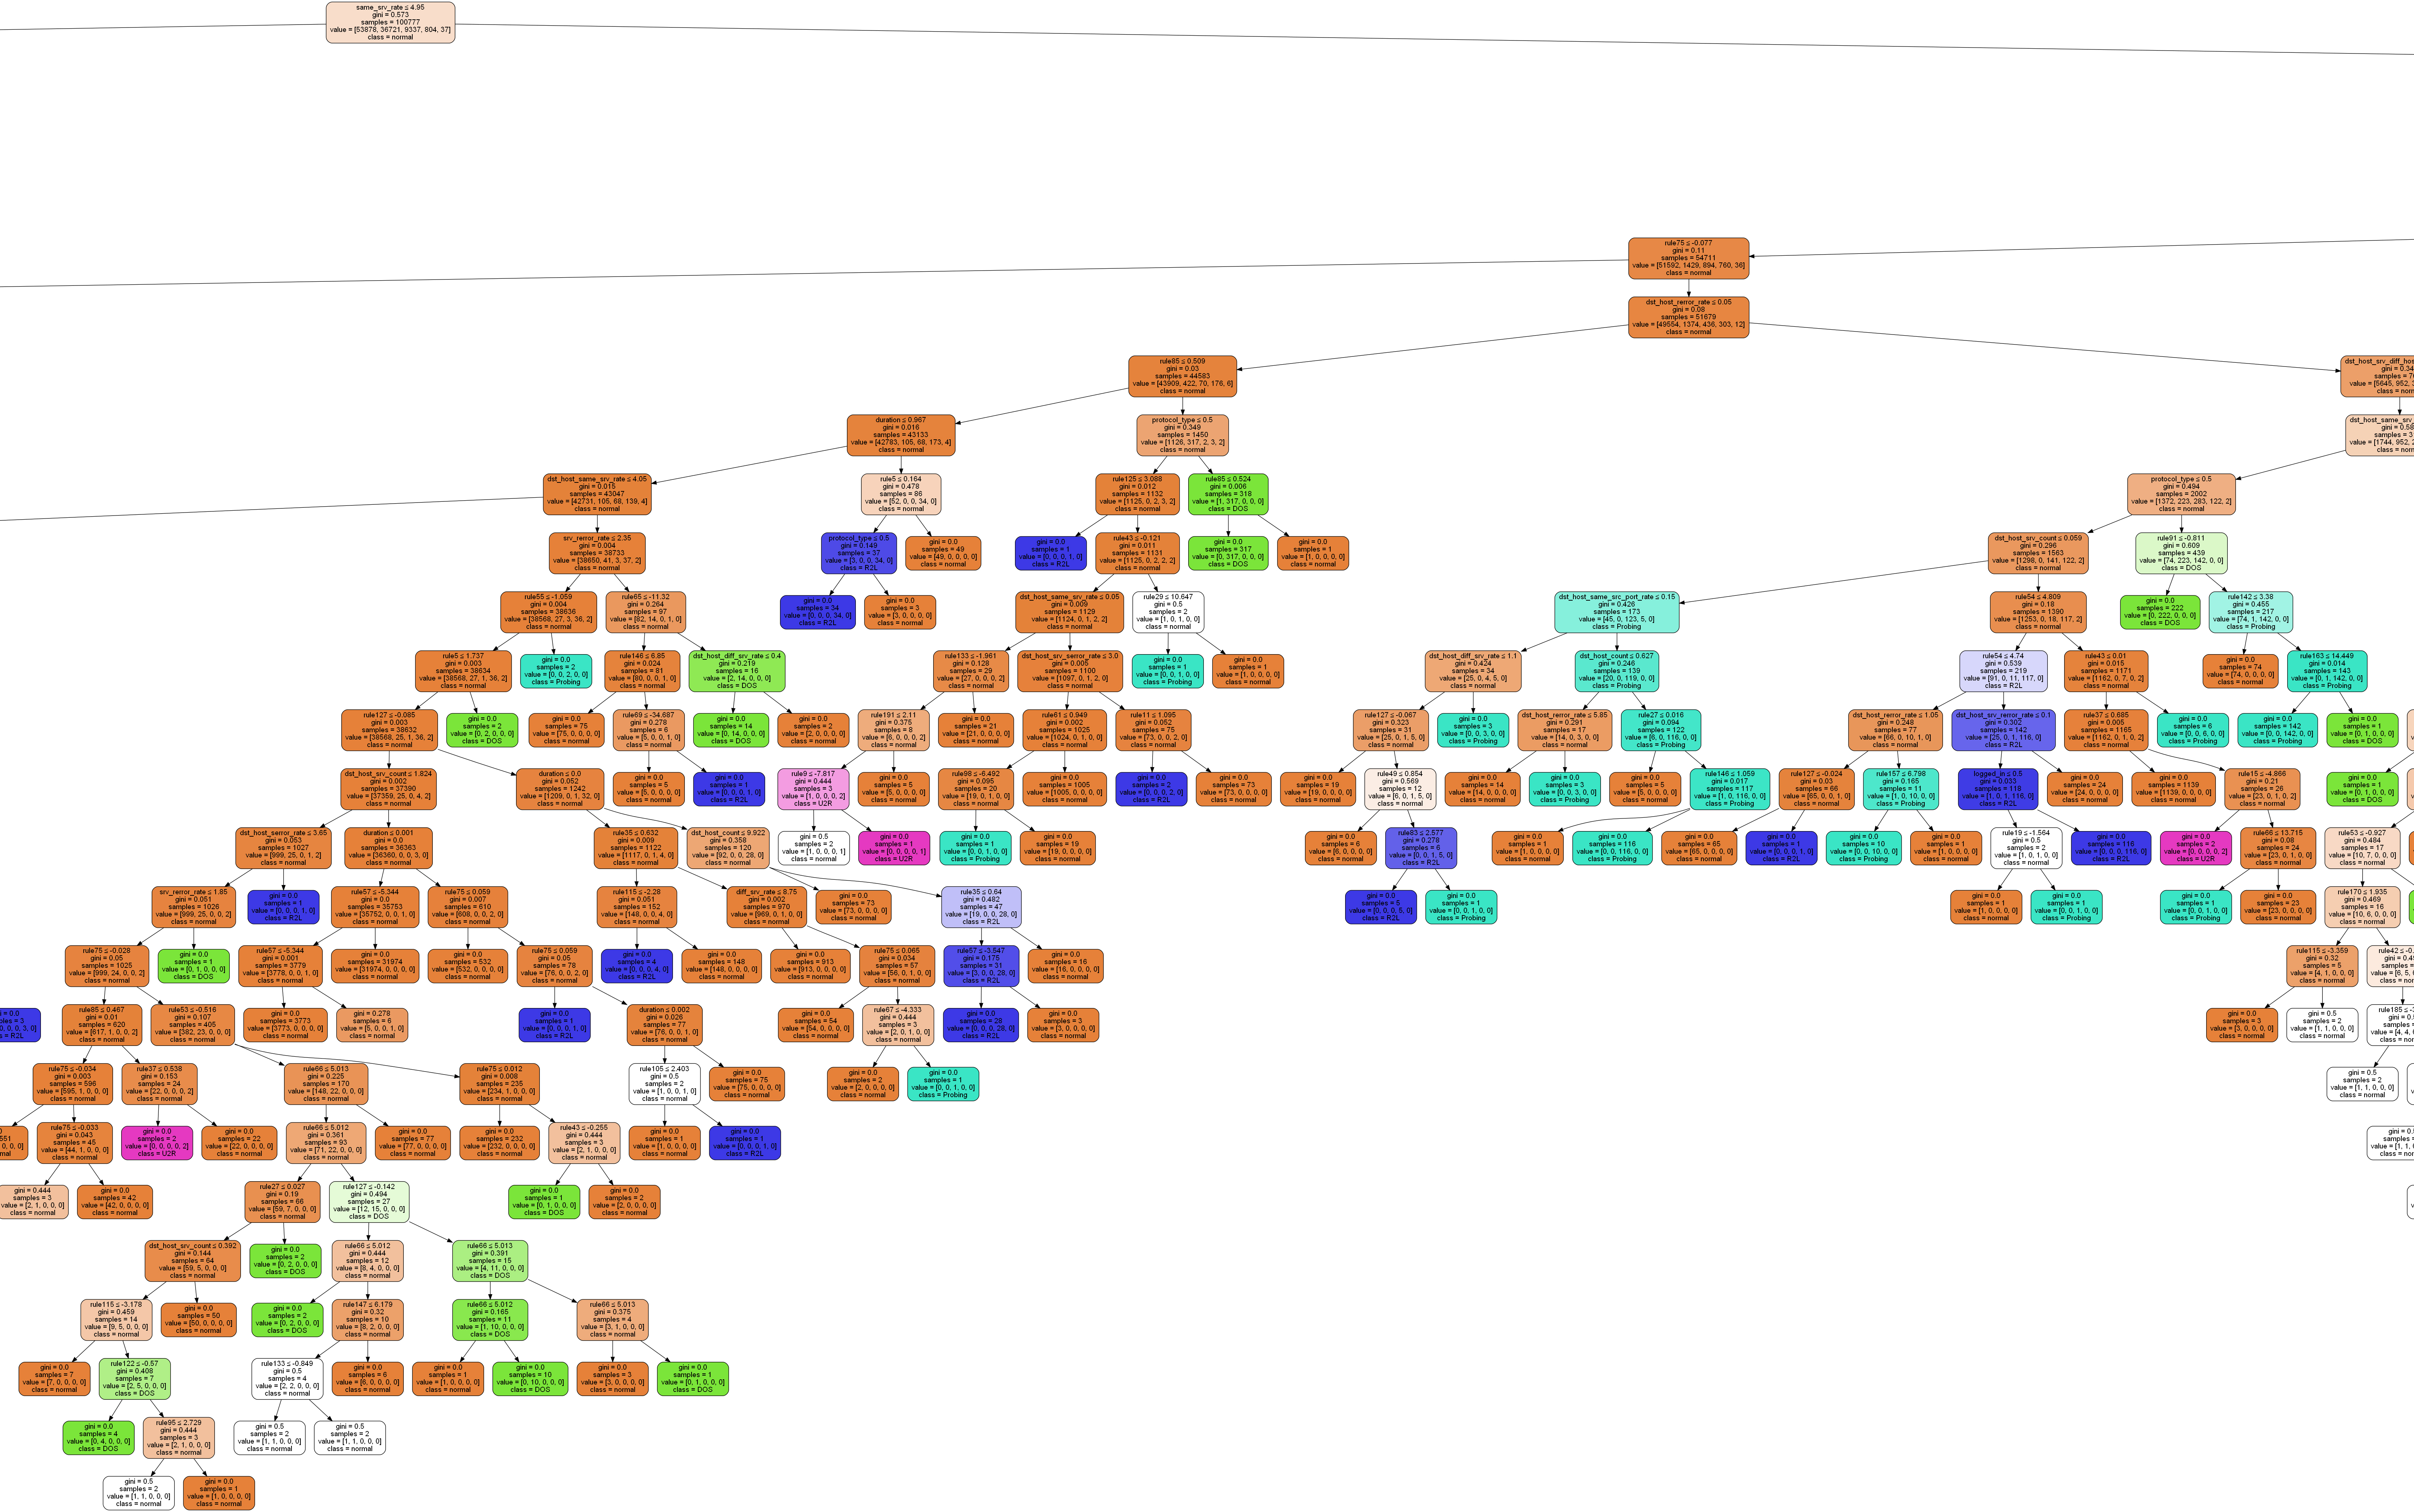
**

**Appendix D. (c) ANFIS-enhanced CART tree. The rules are fuzzy rules by ANFIS.**

**
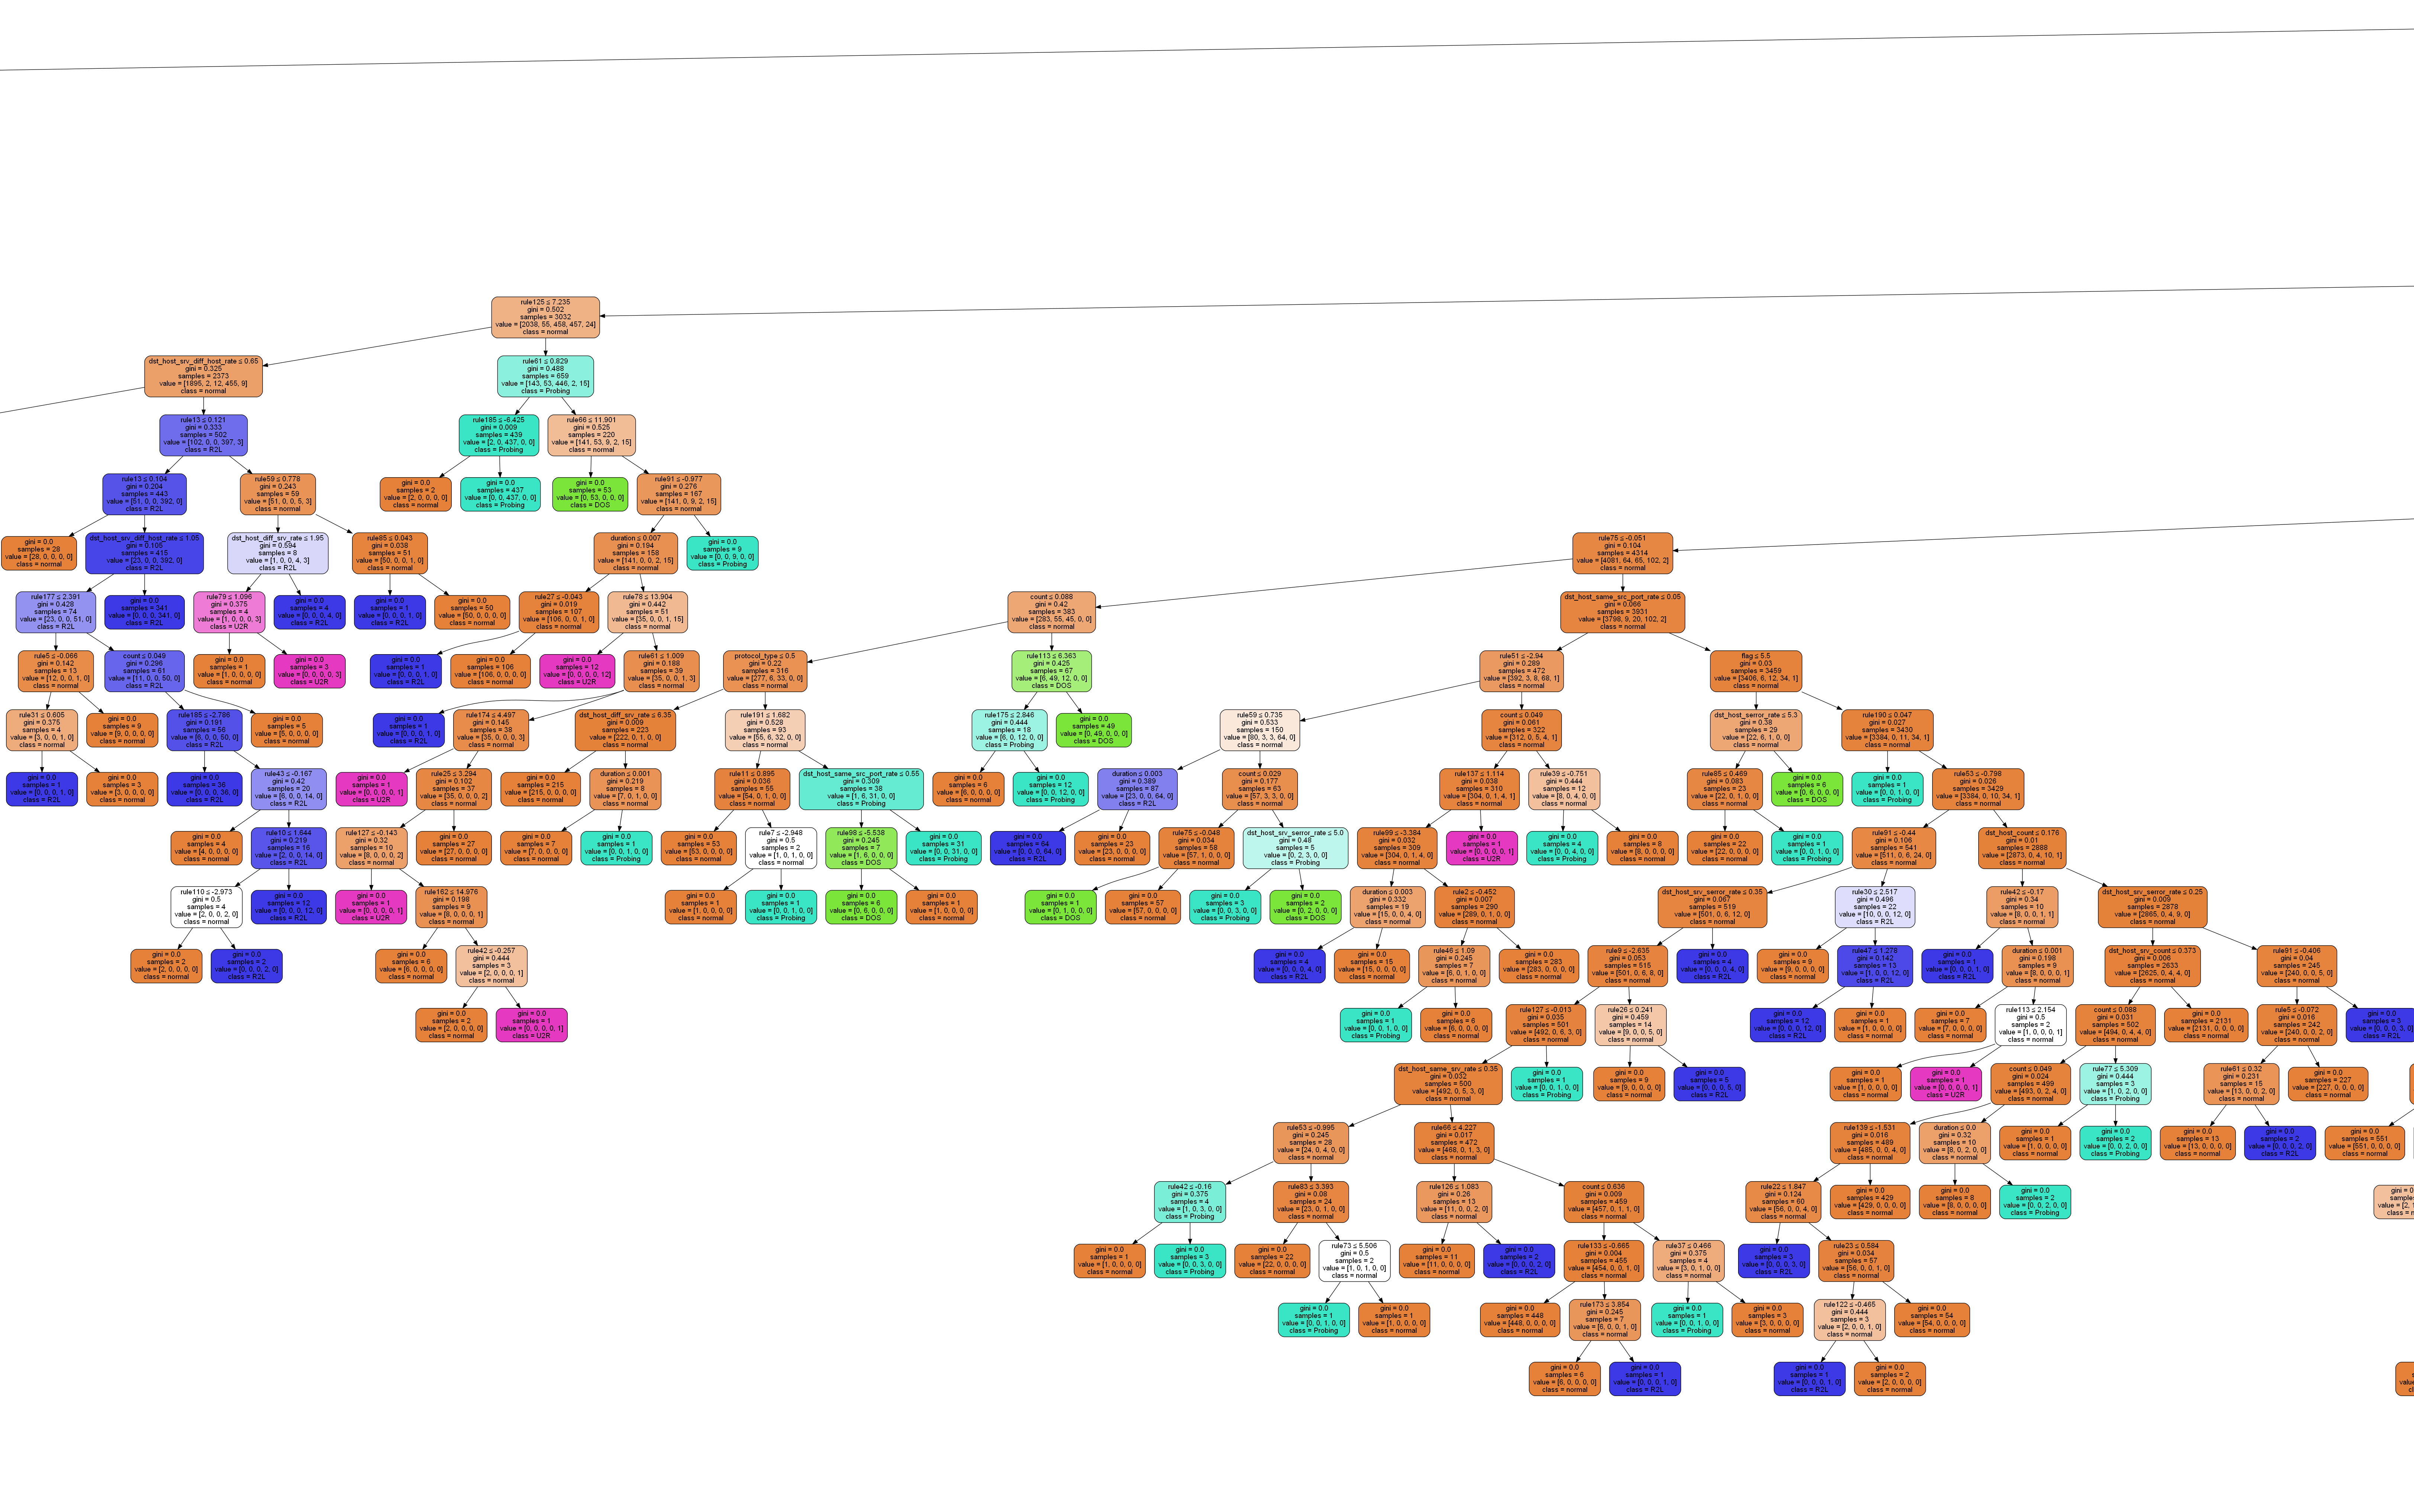
**

**Appendix D. (d) ANFIS-enhanced CART tree. The rules are fuzzy rules by ANFIS.**

**Appendix D. (e) ANFIS-enhanced CART tree. The rules are fuzzy rules by ANFIS.**

**
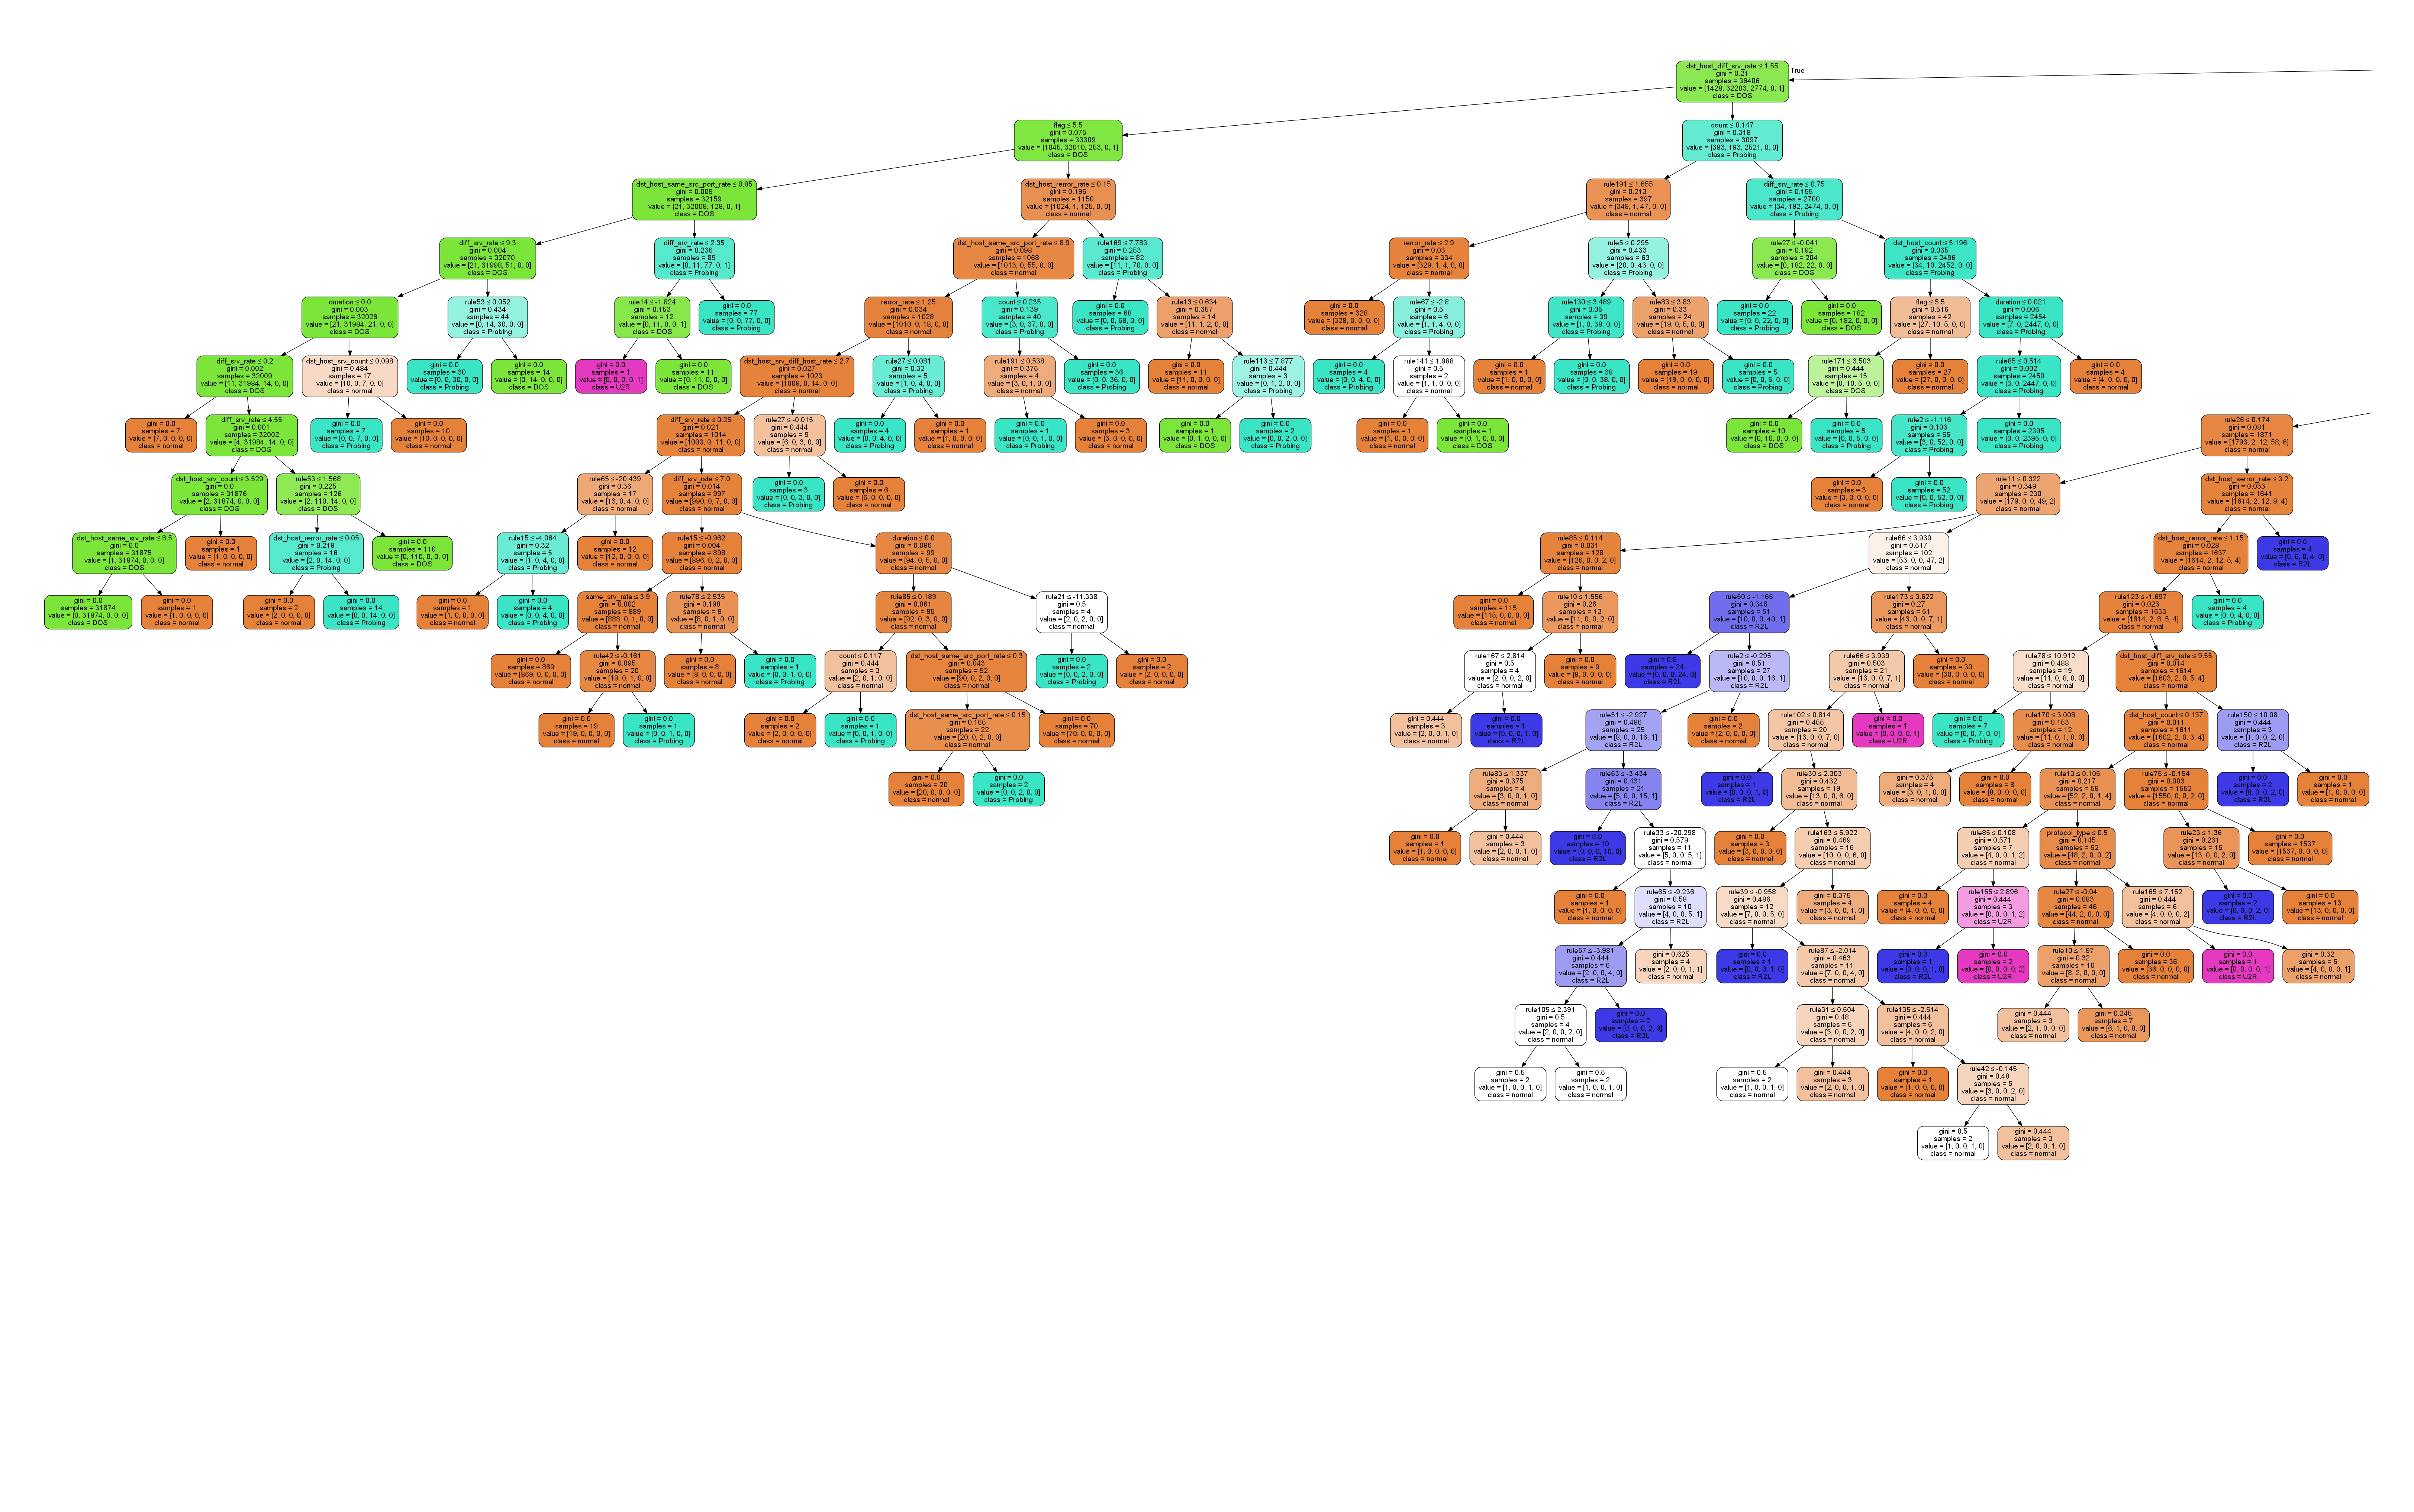
**
