# Supplementary material for: A Hybrid Visualizing Approach Based on Adaptive Neuro-fuzzy Inference System, Decision Tree, and K-means for Intrusion Detection
Source: Research Square preprint supplement (doi:10.21203/rs.3.rs-1770107/v1), 2022-07-01
Supplement: Supplementary file 2 [file 39ecd7ba6ec2558a88305000.docx]

**Appendix C**

| rule number | duration | count | dst_host_count | dst_host_srv_count | r |
| --- | --- | --- | --- | --- | --- |
| rule0 | -0.001081373 | 0.001768952 | -0.054062329 | 0.001218294 | 0.02635674 |
| rule1 | 0.139038563 | 0.077832215 | -0.200930342 | 0.799063981 | -0.385030448 |
| rule2 | 0.132066861 | -0.285668701 | -1.924451113 | 0.634215117 | -0.586823046 |
| rule3 | 0.160386488 | -0.529788375 | -2.695405245 | -0.505216897 | -0.904096603 |
| rule4 | -0.033822022 | 0.799601138 | 0.955424905 | -0.043199532 | 0.11039789 |
| rule5 | -1.860505342 | 4.401194572 | -2.359276533 | -0.784082592 | -0.67827636 |
| rule6 | -0.198397279 | 2.083471298 | 2.683088303 | -1.102190018 | -0.312144995 |
| rule7 | 0.214376464 | -0.311915219 | -2.610447645 | -1.874673605 | -1.05183804 |
| rule8 | -0.216854125 | -0.372936517 | -12.3175993 | -0.938369393 | -1.217832565 |
| rule9 | -0.590529144 | 1.327121377 | -7.090093613 | -0.196419567 | -0.955979288 |
| rule10 | -0.098307095 | 1.08185935 | 2.751200676 | 0.373473167 | -0.148595378 |
| rule11 | -0.00114681 | 0.528308868 | 0.015081241 | -0.788546562 | -0.488345027 |
| rule12 | -0.001322923 | 0.047712218 | 0.03107987 | -0.006127751 | 0.019351611 |
| rule13 | 0.191806406 | 0.246356755 | -0.448630273 | 0.012798227 | -0.51706028 |
| rule14 | 0.181211203 | -0.132366851 | -2.217318773 | -0.781094968 | -0.753827512 |
| rule15 | 0.212443754 | -0.390309364 | -3.019026041 | -1.079549193 | -0.943899572 |
| rule16 | -0.027433943 | -2.640571356 | -7.8497715 | -0.484213769 | -0.769171417 |
| rule17 | -1.548238754 | 1.164277434 | -11.49091148 | -1.900151134 | -1.609097362 |
| rule18 | -0.12165805 | 2.259680986 | 2.23331809 | -1.730063081 | -0.379487753 |
| rule19 | 0.270934731 | -0.12045256 | -2.936773539 | -2.546766281 | -1.094863534 |
| rule20 | -0.154171333 | -13.35506916 | -22.51743507 | -1.991807699 | -2.24693799 |
| rule21 | -0.460084617 | -18.02322006 | -32.57452774 | 0.634644508 | -3.538602352 |
| rule22 | -0.067587785 | 1.483944416 | 3.617157936 | 0.663432539 | -0.068473667 |
| rule23 | 0.025569208 | 0.921133816 | 1.24286294 | 0.0695903 | -0.368428022 |
| rule24 | 0.001383552 | 0.001983907 | 0.000504626 | -0.002595596 | 0.001990248 |
| rule25 | 0.017937519 | 0.425003797 | 1.896654129 | 1.247033834 | -0.342300326 |
| rule26 | -0.008393357 | 0.082253821 | 0.375665635 | 0.423784912 | -0.567577243 |
| rule27 | 0.004580019 | 0.229592174 | 0.184964687 | 0.550007284 | -0.598857939 |
| rule28 | -0.016498374 | -2.355172396 | -6.56633234 | -0.358063519 | -0.652447283 |
| rule29 | -0.142536968 | 2.193591833 | 4.833705425 | 1.25861001 | -0.142307788 |
| rule30 | -0.011521723 | 1.220077634 | 3.852017641 | 0.185011312 | -0.369526386 |
| rule31 | 0.05202603 | 0.425407559 | 1.301709056 | 0.359811991 | -0.657411456 |
| rule32 | -0.120529056 | 42.22142029 | 74.76231384 | 2.662210464 | 7.477144241 |
| rule33 | -0.236752048 | -19.1728344 | -54.53039551 | -3.255004644 | -5.887291431 |
| rule34 | -0.074017659 | 0.818728805 | 2.621268749 | 0.377600431 | -0.252075732 |
| rule35 | -0.061304629 | 0.606279135 | 0.895581007 | -0.582393706 | -0.429499507 |
| rule36 | -1.43E-12 | 5.29E-10 | 3.20E-10 | 3.54E-10 | 5.63E-11 |
| rule37 | 0.22649318 | 0.145881921 | 1.358865499 | -0.239084437 | -0.590341568 |
| rule38 | 0.19332014 | -0.258645356 | -0.410698742 | -1.16710794 | -0.833642244 |
| rule39 | 0.214045718 | 0.059079777 | -0.383914173 | -1.07366538 | -0.822971761 |
| rule40 | 3.32E-09 | 0.010082212 | 0.007777808 | 0.002924394 | 0.001030695 |
| rule41 | 0.284090012 | 0.27335152 | 3.002543688 | -0.196016133 | -0.569669902 |
| rule42 | 0.247772858 | -0.166586131 | 1.006505728 | -1.313096523 | -0.849506676 |
| rule43 | 0.268794537 | 0.179216802 | 1.054638505 | -1.182042122 | -0.835316658 |
| rule44 | 3.35E-09 | 0.002126397 | 0.00232107 | 0.000195794 | 0.000232108 |
| rule45 | 0.023408396 | 0.788968742 | 3.75501132 | 1.071406841 | -0.172280014 |
| rule46 | 0.007694576 | 0.463404953 | 2.705916882 | 0.450632095 | -0.317585111 |
| rule47 | 0.011284348 | 0.837607026 | 2.844821692 | 0.688829958 | -0.29522258 |
| rule48 | -0.004519064 | 0.001422714 | -0.009442911 | -0.003010672 | 0.004939981 |
| rule49 | 0.250881672 | 0.043879054 | -0.378223062 | 1.1298666 | -0.506572962 |
| rule50 | 0.245057687 | -0.479167342 | -2.898801565 | -0.233154982 | -0.939166307 |
| rule51 | 0.28939873 | -0.881568313 | -4.05624485 | -0.596299052 | -1.216325521 |
| rule52 | -0.039527472 | 1.102188468 | 1.394570112 | -0.045735218 | 0.160385922 |
| rule53 | -2.523619413 | 5.876322269 | -4.082207203 | -1.113071918 | -0.927957833 |
| rule54 | -0.233344123 | 2.893269539 | 3.358667374 | -1.705601811 | -0.404224843 |
| rule55 | 0.365388602 | -0.571603179 | -3.91358304 | -2.762370825 | -1.435795069 |
| rule56 | -0.096449003 | -0.389258802 | -11.86398697 | -1.048708439 | -1.168071508 |
| rule57 | -0.648975015 | 1.84504509 | -9.428413391 | -0.262226313 | -1.240134835 |
| rule58 | -0.122723676 | 1.526170611 | 3.675691128 | 0.473174334 | -0.173608884 |
| rule59 | 0.019227743 | 0.716616571 | 0.433105946 | -0.700147212 | -0.594456077 |
| rule60 | -0.004726472 | 0.01691396 | -0.002994359 | -0.004693782 | 0.008491442 |
| rule61 | 0.327764302 | 0.25034219 | -0.855771124 | 0.087053426 | -0.633770883 |
| rule62 | 0.316109389 | -0.302399963 | -3.430533409 | -1.188510656 | -1.026818037 |
| rule63 | 0.364781171 | -0.722803831 | -4.575351238 | -1.583468676 | -1.298059225 |
| rule64 | -0.032212023 | -3.443399429 | -10.25354004 | -0.63297838 | -1.003252029 |
| rule65 | -2.088859797 | 1.696448684 | -16.20996094 | -2.723174572 | -2.189775467 |
| rule66 | -0.122992493 | 3.100889921 | 2.821798563 | -2.524126053 | -0.493132323 |
| rule67 | 0.447178274 | -0.339542449 | -4.412407398 | -3.696424007 | -1.502890944 |
| rule68 | -0.119420961 | -30.40664101 | -70.93028259 | -3.970664024 | -7.081583023 |
| rule69 | -0.494559944 | -31.49012566 | -58.61354065 | 0.432494402 | -6.206771851 |
| rule70 | -0.078758582 | 1.9283216 | 4.559586525 | 0.620995343 | -0.095715322 |
| rule71 | 0.057522438 | 1.396550536 | 2.190544605 | 0.559102178 | -0.424201638 |
| rule72 | 0.001868544 | 0.002623487 | 0.000763689 | -0.003362291 | 0.00275181 |
| rule73 | 0.071997277 | 0.561711729 | 2.681076288 | 1.727264643 | -0.422927201 |
| rule74 | 0.033724435 | 0.07018654 | 0.485408992 | 0.538267136 | -0.746230483 |
| rule75 | 0.055048671 | 0.245709956 | 0.230158791 | 0.700734556 | -0.790516555 |
| rule76 | -0.020229546 | -3.153582335 | -8.750577927 | -0.476223409 | -0.869057298 |
| rule77 | -0.148974016 | 3.224707127 | 7.351079941 | 1.864966154 | -0.07310807 |
| rule78 | 0.02647179 | 1.698243618 | 5.471745491 | 0.290784985 | -0.44276306 |
| rule79 | 0.12106391 | 0.516711295 | 1.843843341 | 0.517369628 | -0.854248047 |
| rule80 | -0.151729286 | -27.01334381 | -69.70384979 | -3.539674282 | -6.969000816 |
| rule81 | -0.29708153 | -35.90541458 | -91.80428314 | -5.370013237 | -9.739413261 |
| rule82 | -0.091568582 | 1.162162662 | 3.780166626 | 0.605331957 | -0.292876184 |
| rule83 | -0.071819089 | 0.854179382 | 1.447196364 | -0.656881988 | -0.534337461 |
| rule84 | -1.95E-12 | 7.01E-10 | 4.25E-10 | 4.70E-10 | 7.48E-11 |
| rule85 | 0.387769043 | 0.166923299 | 1.790740252 | -0.59646982 | -0.796040595 |
| rule86 | 0.339234829 | -0.41465345 | -0.768332541 | -1.938379526 | -1.146881223 |
| rule87 | 0.372258693 | 0.00825736 | -0.711018741 | -1.829311728 | -1.130831003 |
| rule88 | 4.57E-09 | 0.013418086 | 0.010364574 | 0.003880391 | 0.001371589 |
| rule89 | 0.468460143 | 0.352972358 | 4.189837933 | -0.413980484 | -0.740005851 |
| rule90 | 0.415261477 | -0.278165549 | 1.304824233 | -2.026432991 | -1.143274188 |
| rule91 | 0.448907703 | 0.178744435 | 1.396084189 | -1.867810249 | -1.121955037 |
| rule92 | 4.47E-09 | 0.03839048 | 0.038322512 | 0.00361887 | 0.003832253 |
| rule93 | 0.055013657 | 1.54572022 | 5.772963524 | 1.755168796 | -0.141005889 |
| rule94 | 0.032006182 | 0.857899666 | 4.040636063 | 0.764200628 | -0.371578753 |
| rule95 | 0.038780957 | 1.343895316 | 4.23221302 | 1.10833478 | -0.341175795 |
| rule96 | -0.004151078 | -2.14E-05 | -9.54E-05 | -8.71E-05 | -0.001094347 |
| rule97 | -0.002720724 | -0.448085606 | -1.988174677 | 0.298294693 | -0.842814147 |
| rule98 | -0.041786838 | -0.963900745 | -4.398100853 | -1.034447908 | -1.171277881 |
| rule99 | -0.00346219 | -1.126066446 | -4.983433247 | -0.963133991 | -1.287170887 |
| rule100 | 0.002068437 | 1.48E-05 | 0.007390857 | 2.78E-05 | 0.000722609 |
| rule101 | -0.691599369 | 1.277299643 | 3.771636248 | 1.371480465 | -0.46404174 |
| rule102 | -0.323258072 | 0.753013194 | 2.017140865 | -0.15969345 | -0.745896995 |
| rule103 | 0.024319593 | -0.802916229 | -2.066513777 | -0.104076743 | -1.203748345 |
| rule104 | 0.12830852 | 0.000990826 | 0.261510909 | 0.002312399 | 0.026151128 |
| rule105 | -0.298324764 | 1.093824863 | 4.204276085 | 1.41082406 | -0.16329959 |
| rule106 | -0.280432194 | 0.828949153 | 3.078096151 | 0.704080045 | -0.328266531 |
| rule107 | -0.19813332 | 0.553813577 | 1.837641597 | 0.824058235 | -0.464335352 |
| rule108 | -0.003877367 | -2.00E-05 | -8.83E-05 | -8.14E-05 | -0.001022717 |
| rule109 | 0.064386941 | -0.278280854 | -2.443759918 | -0.480077893 | -0.902121484 |
| rule110 | 0.023635656 | -0.805821121 | -4.918300152 | -1.847494125 | -1.238936067 |
| rule111 | 0.066248633 | -0.977693081 | -5.484055996 | -1.768696189 | -1.351808429 |
| rule112 | 0.001592415 | 9.61E-06 | 0.005804855 | 2.08E-05 | 0.000565126 |
| rule113 | -0.545165539 | 1.557469606 | 3.666261911 | 0.555639088 | -0.488375396 |
| rule114 | -0.236640856 | 1.022432208 | 1.739607215 | -1.01372695 | -0.78938514 |
| rule115 | 0.099953808 | -0.605848789 | -2.536178827 | -0.962924957 | -1.265654445 |
| rule116 | 0.021737773 | 0.000154318 | 0.043381479 | 0.00032846 | 0.004338145 |
| rule117 | -0.257518888 | 1.346171737 | 4.284375668 | 1.04075253 | -0.153720364 |
| rule118 | -0.242931396 | 1.077871203 | 3.128784418 | 0.318505555 | -0.322331011 |
| rule119 | -0.16267693 | 0.785520494 | 1.842778683 | 0.439055264 | -0.462623179 |
| rule120 | 3.59E-07 | 7.44E-09 | 5.09E-08 | 4.02E-07 | 3.25E-07 |
| rule121 | -0.199718088 | 0.205600634 | 1.4254179 | 1.142837644 | -0.57694602 |
| rule122 | -0.238094524 | -0.254577249 | -0.620090723 | 0.047523368 | -0.858030379 |
| rule123 | -0.220653951 | -0.025890736 | -0.712036729 | 0.22312066 | -0.870306194 |
| rule124 | 0.000409024 | 1.54E-06 | 0.001442077 | 5.40E-06 | 0.000144257 |
| rule125 | -0.257567465 | 0.790305436 | 4.124883175 | 0.921872616 | -0.51586771 |
| rule126 | -0.262752473 | 0.285182744 | 1.919414639 | -0.357197881 | -0.828461707 |
| rule127 | -0.202736869 | 0.080827564 | 0.538424194 | -0.199167341 | -0.967324555 |
| rule128 | 4.88E-05 | 1.14E-05 | 0.000195872 | 7.54E-07 | 1.96E-05 |
| rule129 | -0.281838 | 0.939811409 | 3.913063765 | 1.113680959 | -0.238107562 |
| rule130 | -0.294478238 | 0.689358354 | 2.847950459 | 0.507178366 | -0.391237527 |
| rule131 | -0.284246773 | 0.817768276 | 2.439880371 | 0.659427166 | -0.42676568 |
| rule132 | -2.34E-12 | 2.60E-11 | -3.22E-11 | 1.55E-11 | -2.90E-12 |
| rule133 | 0.080208391 | -0.112983108 | 0.640508294 | -1.061910629 | -0.891350865 |
| rule134 | 0.032423679 | -0.659290731 | -1.762480736 | -2.323480129 | -1.220976353 |
| rule135 | 0.059984226 | -0.261609197 | -1.721788287 | -2.219854832 | -1.207036138 |
| rule136 | -2.55E-12 | 5.44E-09 | 4.14E-09 | 1.58E-09 | 5.49E-10 |
| rule137 | 0.109747104 | 0.0300116 | 2.788052559 | -0.945368052 | -0.854665279 |
| rule138 | 0.057223402 | -0.590050817 | 0.054780204 | -2.42775631 | -1.235571265 |
| rule139 | 0.084819868 | -0.132582933 | 0.142871946 | -2.289439201 | -1.214559078 |
| rule140 | -1.66E-12 | 1.52E-08 | 1.53E-08 | 1.44E-09 | 1.52E-09 |
| rule141 | -0.174044609 | 0.738465846 | 4.232902527 | 0.987543821 | -0.276816636 |
| rule142 | -0.197635144 | 0.43904826 | 2.956787348 | 0.28764087 | -0.458290726 |
| rule143 | -0.19387579 | 0.775994062 | 3.00496316 | 0.439241767 | -0.442843378 |
| rule144 | -0.002012988 | -5.18E-06 | -0.000498161 | -0.000134919 | -0.000264649 |
| rule145 | 0.332277179 | 1.528301477 | 10.3962822 | 5.348337173 | 0.449001253 |
| rule146 | 0.291928738 | 0.977288127 | 7.894379139 | 3.957846642 | 0.104648538 |
| rule147 | 0.32136488 | 1.448859096 | 8.438435555 | 4.553383827 | 0.193117037 |
| rule148 | -0.062932283 | -0.00028249 | -0.07204517 | -0.000585873 | -0.007238658 |
| rule149 | -0.787251651 | 1.238612413 | 8.908841133 | 4.177410126 | 0.060095165 |
| rule150 | 0.078895994 | 0.621285737 | 7.10497427 | 2.595172167 | -0.231935546 |
| rule151 | 0.386761248 | 1.155265689 | 7.933054447 | 3.18535471 | -0.114654452 |
| rule152 | 0.072855644 | 0.000243537 | 0.062223762 | 0.000488029 | 0.006222373 |
| rule153 | -0.519348264 | 1.116298914 | 5.376068592 | 2.247624874 | -0.074370012 |
| rule154 | -0.042074516 | 0.821151733 | 4.656406879 | 1.519568682 | -0.201288447 |
| rule155 | 0.032181624 | 1.179224133 | 4.906630516 | 1.818805099 | -0.158381179 |
| rule156 | -0.001712054 | -4.40E-06 | -0.000423688 | -0.000114749 | -0.000225085 |
| rule157 | 0.406323433 | 1.86816299 | 10.72436523 | 4.865225315 | 0.479352862 |
| rule158 | 0.36438635 | 1.305169344 | 8.157360077 | 3.43857193 | 0.126774207 |
| rule159 | 0.396506995 | 1.786006451 | 8.742208481 | 4.058995247 | 0.220422089 |
| rule160 | -0.051362179 | -0.0002305 | -0.058781255 | -0.000478731 | -0.005907141 |
| rule161 | -0.558796346 | 1.599603772 | 9.312674522 | 3.58443594 | 0.096339598 |
| rule162 | 0.172738671 | 0.968842208 | 7.293314457 | 1.962142467 | -0.219135985 |
| rule163 | 0.467675239 | 1.512906432 | 8.144284248 | 2.575136423 | -0.098575927 |
| rule164 | -0.234258235 | -0.001076021 | -0.274922997 | -0.00215626 | -0.027492339 |
| rule165 | -0.396524787 | 1.404635549 | 5.699707985 | 1.937833428 | -0.03712216 |
| rule166 | -0.001937766 | 1.105009675 | 4.858265877 | 1.19314456 | -0.176892996 |
| rule167 | 0.069842286 | 1.470051885 | 5.124083996 | 1.501168013 | -0.132052377 |
| rule168 | -1.86E-12 | 2.67E-11 | -3.31E-11 | 1.53E-11 | -3.01E-12 |
| rule169 | 0.062985294 | 0.750344336 | 4.695841789 | 2.388947248 | -0.291291595 |
| rule170 | 0.026967481 | 0.270852387 | 2.591834545 | 1.260462642 | -0.58098191 |
| rule171 | 0.04048967 | 0.715738356 | 2.805474997 | 1.588949561 | -0.541736484 |
| rule172 | -0.02435345 | -0.000109517 | -0.027981641 | -0.000219464 | -0.002798159 |
| rule173 | -0.019379646 | 0.621891141 | 4.910216808 | 1.360837579 | -0.510390222 |
| rule174 | 0.050177414 | 0.076765157 | 2.640815258 | 0.045022875 | -0.832581043 |
| rule175 | 0.102403983 | 0.58518213 | 2.890043497 | 0.383351952 | -0.788845837 |
| rule176 | -0.146197721 | -0.000657474 | -0.167984858 | -0.001317527 | -0.016798459 |
| rule177 | -0.25597772 | 0.91456902 | 3.982939959 | 1.213005424 | -0.282657206 |
| rule178 | -0.078414552 | 0.648569882 | 3.077502251 | 0.58798033 | -0.421701282 |
| rule179 | -0.068998419 | 0.998229861 | 3.146682501 | 0.80227977 | -0.402373135 |
| rule180 | -1.91E-12 | 2.77E-11 | -3.46E-11 | 1.65E-11 | -3.12E-12 |
| rule181 | 0.293499172 | -0.821864784 | -3.05713439 | -3.008848667 | -1.440822244 |
| rule182 | 0.248123869 | -1.377656698 | -5.477371693 | -4.271422863 | -1.77315712 |
| rule183 | 0.27527082 | -0.953180373 | -5.584542274 | -4.221579075 | -1.778220177 |
| rule184 | -2.04E-12 | 3.19E-11 | -3.92E-11 | 1.82E-11 | -3.62E-12 |
| rule185 | 0.373742163 | -0.745830357 | -1.031740308 | -3.08911109 | -1.443919063 |
| rule186 | 0.323927075 | -1.379240513 | -3.796514273 | -4.580729961 | -1.829644799 |
| rule187 | 0.351587474 | -0.877773046 | -3.846138239 | -4.490730762 | -1.826408386 |
| rule188 | -1.29E-12 | 2.26E-11 | -2.58E-11 | 1.29E-11 | -2.35E-12 |
| rule189 | 0.03230501 | 0.496430099 | 2.980915308 | 0.247499153 | -0.49947843 |
| rule190 | 0.010782043 | 0.188266158 | 1.678574681 | -0.464001805 | -0.684982896 |
| rule191 | 0.015415906 | 0.548541963 | 1.671357512 | -0.324017853 | -0.676208138 |

**Appendix C. The Coefficient with Four Attributes of Each Rule in Modified ANFIS**
