# Supplementary material for: A Hybrid Visualizing Approach Based on Adaptive Neuro-fuzzy Inference System, Decision Tree, and K-means for Intrusion Detection
Source: Research Square preprint supplement (doi:10.21203/rs.3.rs-1770107/v1), 2022-07-01
Supplement: Supplementary file 3 [file 65c0fb8dcdeab2e8c5d68e16.docx]

**Appendix B**

| rule_num | duration | count | dst_host_count | dst_host_srv_count |
| --- | --- | --- | --- | --- |
| rule0 | 0 | 0 | 0 | 0 |
| rule1 | 0 | 0 | 0 | 1 |
| rule2 | 0 | 0 | 0 | 2 |
| rule3 | 0 | 0 | 0 | 3 |
| rule4 | 0 | 0 | 1 | 0 |
| rule5 | 0 | 0 | 1 | 1 |
| rule6 | 0 | 0 | 1 | 2 |
| rule7 | 0 | 0 | 1 | 3 |
| rule8 | 0 | 0 | 2 | 0 |
| rule9 | 0 | 0 | 2 | 1 |
| rule10 | 0 | 0 | 2 | 2 |
| rule11 | 0 | 0 | 2 | 3 |
| rule12 | 0 | 1 | 0 | 0 |
| rule13 | 0 | 1 | 0 | 1 |
| rule14 | 0 | 1 | 0 | 2 |
| rule15 | 0 | 1 | 0 | 3 |
| rule16 | 0 | 1 | 1 | 0 |
| rule17 | 0 | 1 | 1 | 1 |
| rule18 | 0 | 1 | 1 | 2 |
| rule19 | 0 | 1 | 1 | 3 |
| rule20 | 0 | 1 | 2 | 0 |
| rule21 | 0 | 1 | 2 | 1 |
| rule22 | 0 | 1 | 2 | 2 |
| rule23 | 0 | 1 | 2 | 3 |
| rule24 | 0 | 2 | 0 | 0 |
| rule25 | 0 | 2 | 0 | 1 |
| rule26 | 0 | 2 | 0 | 2 |
| rule27 | 0 | 2 | 0 | 3 |
| rule28 | 0 | 2 | 1 | 0 |
| rule29 | 0 | 2 | 1 | 1 |
| rule30 | 0 | 2 | 1 | 2 |
| rule31 | 0 | 2 | 1 | 3 |
| rule32 | 0 | 2 | 2 | 0 |
| rule33 | 0 | 2 | 2 | 1 |
| rule34 | 0 | 2 | 2 | 2 |
| rule35 | 0 | 2 | 2 | 3 |
| rule36 | 0 | 3 | 0 | 0 |
| rule37 | 0 | 3 | 0 | 1 |
| rule38 | 0 | 3 | 0 | 2 |
| rule39 | 0 | 3 | 0 | 3 |
| rule40 | 0 | 3 | 1 | 0 |
| rule41 | 0 | 3 | 1 | 1 |
| rule42 | 0 | 3 | 1 | 2 |
| rule43 | 0 | 3 | 1 | 3 |
| rule44 | 0 | 3 | 2 | 0 |
| rule45 | 0 | 3 | 2 | 1 |
| rule46 | 0 | 3 | 2 | 2 |
| rule47 | 0 | 3 | 2 | 3 |
| rule48 | 1 | 0 | 0 | 0 |
| rule49 | 1 | 0 | 0 | 1 |
| rule50 | 1 | 0 | 0 | 2 |
| rule51 | 1 | 0 | 0 | 3 |
| rule52 | 1 | 0 | 1 | 0 |
| rule53 | 1 | 0 | 1 | 1 |
| rule54 | 1 | 0 | 1 | 2 |
| rule55 | 1 | 0 | 1 | 3 |
| rule56 | 1 | 0 | 2 | 0 |
| rule57 | 1 | 0 | 2 | 1 |
| rule58 | 1 | 0 | 2 | 2 |
| rule59 | 1 | 0 | 2 | 3 |
| rule60 | 1 | 1 | 0 | 0 |
| rule61 | 1 | 1 | 0 | 1 |
| rule62 | 1 | 1 | 0 | 2 |
| rule63 | 1 | 1 | 0 | 3 |
| rule64 | 1 | 1 | 1 | 0 |
| rule65 | 1 | 1 | 1 | 1 |
| rule66 | 1 | 1 | 1 | 2 |
| rule67 | 1 | 1 | 1 | 3 |
| rule68 | 1 | 1 | 2 | 0 |
| rule69 | 1 | 1 | 2 | 1 |
| rule70 | 1 | 1 | 2 | 2 |
| rule71 | 1 | 1 | 2 | 3 |
| rule72 | 1 | 2 | 0 | 0 |
| rule73 | 1 | 2 | 0 | 1 |
| rule74 | 1 | 2 | 0 | 2 |
| rule75 | 1 | 2 | 0 | 3 |
| rule76 | 1 | 2 | 1 | 0 |
| rule77 | 1 | 2 | 1 | 1 |
| rule78 | 1 | 2 | 1 | 2 |
| rule79 | 1 | 2 | 1 | 3 |
| rule80 | 1 | 2 | 2 | 0 |
| rule81 | 1 | 2 | 2 | 1 |
| rule82 | 1 | 2 | 2 | 2 |
| rule83 | 1 | 2 | 2 | 3 |
| rule84 | 1 | 3 | 0 | 0 |
| rule85 | 1 | 3 | 0 | 1 |
| rule86 | 1 | 3 | 0 | 2 |
| rule87 | 1 | 3 | 0 | 3 |
| rule88 | 1 | 3 | 1 | 0 |
| rule89 | 1 | 3 | 1 | 1 |
| rule90 | 1 | 3 | 1 | 2 |
| rule91 | 1 | 3 | 1 | 3 |
| rule92 | 1 | 3 | 2 | 0 |
| rule93 | 1 | 3 | 2 | 1 |
| rule94 | 1 | 3 | 2 | 2 |
| rule95 | 1 | 3 | 2 | 3 |
| rule96 | 2 | 0 | 0 | 0 |
| rule97 | 2 | 0 | 0 | 1 |
| rule98 | 2 | 0 | 0 | 2 |
| rule99 | 2 | 0 | 0 | 3 |
| rule100 | 2 | 0 | 1 | 0 |
| rule101 | 2 | 0 | 1 | 1 |
| rule102 | 2 | 0 | 1 | 2 |
| rule103 | 2 | 0 | 1 | 3 |
| rule104 | 2 | 0 | 2 | 0 |
| rule105 | 2 | 0 | 2 | 1 |
| rule106 | 2 | 0 | 2 | 2 |
| rule107 | 2 | 0 | 2 | 3 |
| rule108 | 2 | 1 | 0 | 0 |
| rule109 | 2 | 1 | 0 | 1 |
| rule110 | 2 | 1 | 0 | 2 |
| rule111 | 2 | 1 | 0 | 3 |
| rule112 | 2 | 1 | 1 | 0 |
| rule113 | 2 | 1 | 1 | 1 |
| rule114 | 2 | 1 | 1 | 2 |
| rule115 | 2 | 1 | 1 | 3 |
| rule116 | 2 | 1 | 2 | 0 |
| rule117 | 2 | 1 | 2 | 1 |
| rule118 | 2 | 1 | 2 | 2 |
| rule119 | 2 | 1 | 2 | 3 |
| rule120 | 2 | 2 | 0 | 0 |
| rule121 | 2 | 2 | 0 | 1 |
| rule122 | 2 | 2 | 0 | 2 |
| rule123 | 2 | 2 | 0 | 3 |
| rule124 | 2 | 2 | 1 | 0 |
| rule125 | 2 | 2 | 1 | 1 |
| rule126 | 2 | 2 | 1 | 2 |
| rule127 | 2 | 2 | 1 | 3 |
| rule128 | 2 | 2 | 2 | 0 |
| rule129 | 2 | 2 | 2 | 1 |
| rule130 | 2 | 2 | 2 | 2 |
| rule131 | 2 | 2 | 2 | 3 |
| rule132 | 2 | 3 | 0 | 0 |
| rule133 | 2 | 3 | 0 | 1 |
| rule134 | 2 | 3 | 0 | 2 |
| rule135 | 2 | 3 | 0 | 3 |
| rule136 | 2 | 3 | 1 | 0 |
| rule137 | 2 | 3 | 1 | 1 |
| rule138 | 2 | 3 | 1 | 2 |
| rule139 | 2 | 3 | 1 | 3 |
| rule140 | 2 | 3 | 2 | 0 |
| rule141 | 2 | 3 | 2 | 1 |
| rule142 | 2 | 3 | 2 | 2 |
| rule143 | 2 | 3 | 2 | 3 |
| rule144 | 3 | 0 | 0 | 0 |
| rule145 | 3 | 0 | 0 | 1 |
| rule146 | 3 | 0 | 0 | 2 |
| rule147 | 3 | 0 | 0 | 3 |
| rule148 | 3 | 0 | 1 | 0 |
| rule149 | 3 | 0 | 1 | 1 |
| rule150 | 3 | 0 | 1 | 2 |
| rule151 | 3 | 0 | 1 | 3 |
| rule152 | 3 | 0 | 2 | 0 |
| rule153 | 3 | 0 | 2 | 1 |
| rule154 | 3 | 0 | 2 | 2 |
| rule155 | 3 | 0 | 2 | 3 |
| rule156 | 3 | 1 | 0 | 0 |
| rule157 | 3 | 1 | 0 | 1 |
| rule158 | 3 | 1 | 0 | 2 |
| rule159 | 3 | 1 | 0 | 3 |
| rule160 | 3 | 1 | 1 | 0 |
| rule161 | 3 | 1 | 1 | 1 |
| rule162 | 3 | 1 | 1 | 2 |
| rule163 | 3 | 1 | 1 | 3 |
| rule164 | 3 | 1 | 2 | 0 |
| rule165 | 3 | 1 | 2 | 1 |
| rule166 | 3 | 1 | 2 | 2 |
| rule167 | 3 | 1 | 2 | 3 |
| rule168 | 3 | 2 | 0 | 0 |
| rule169 | 3 | 2 | 0 | 1 |
| rule170 | 3 | 2 | 0 | 2 |
| rule171 | 3 | 2 | 0 | 3 |
| rule172 | 3 | 2 | 1 | 0 |
| rule173 | 3 | 2 | 1 | 1 |
| rule174 | 3 | 2 | 1 | 2 |
| rule175 | 3 | 2 | 1 | 3 |
| rule176 | 3 | 2 | 2 | 0 |
| rule177 | 3 | 2 | 2 | 1 |
| rule178 | 3 | 2 | 2 | 2 |
| rule179 | 3 | 2 | 2 | 3 |
| rule180 | 3 | 3 | 0 | 0 |
| rule181 | 3 | 3 | 0 | 1 |
| rule182 | 3 | 3 | 0 | 2 |
| rule183 | 3 | 3 | 0 | 3 |
| rule184 | 3 | 3 | 1 | 0 |
| rule185 | 3 | 3 | 1 | 1 |
| rule186 | 3 | 3 | 1 | 2 |
| rule187 | 3 | 3 | 1 | 3 |
| rule188 | 3 | 3 | 2 | 0 |
| rule189 | 3 | 3 | 2 | 1 |
| rule190 | 3 | 3 | 2 | 2 |
| rule191 | 3 | 3 | 2 | 3 |
| 0-3 represent the interval of attribute | | | | |

**Appendix B. The Generated Rules with Four Attributes of Modified ANFIS**
